# Supplementary material for: Spark Plasma Sintering-Assisted Synthesis of Bi2Fe4O9/Bi25FeO40 Heterostructures with Enhanced Photocatalytic Activity for Removal of Antibiotics
Source: MDPI journal article supplement (doi:10.3390/ijms232012652), 2022-10-21
Supplement: s1 [file s1]

# Supporting Information

## Spark Plasma Sintering-Assisted Synthesis of $\text{Bi}_2\text{Fe}_4\text{O}_9/\text{Bi}_{25}\text{FeO}_{40}$ Heterostructures with Enhanced Photocatalytic Activity for Removal of Antibiotics

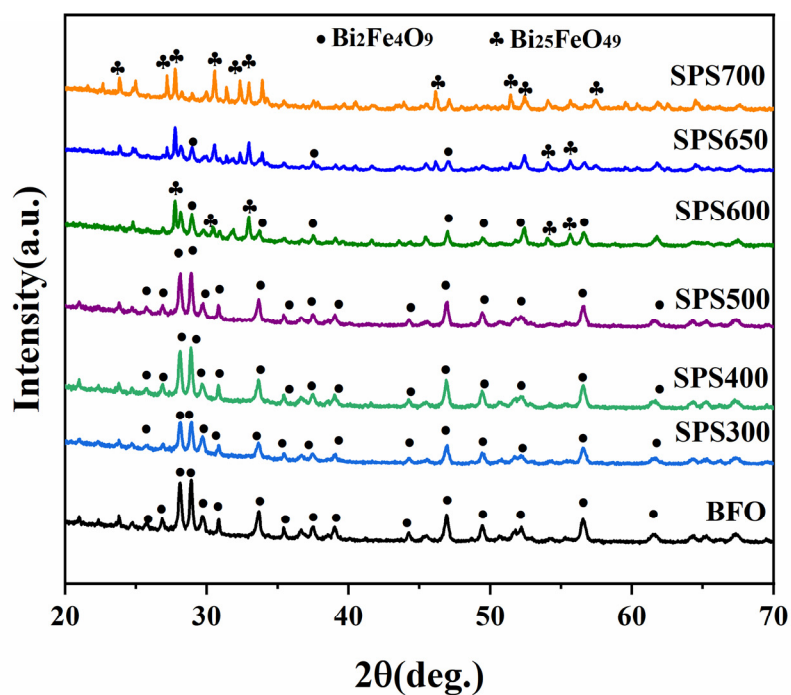

**Figure S1.** X-ray diffraction (XRD) spectra of as-prepared samples.

**Table S1.** The Percentage of  $\text{Bi}_2\text{Fe}_4\text{O}_9$  and  $\text{Bi}_{25}\text{FeO}_{40}$  in the BFO heterojunction composites.

|                                    | BFO  | SPS600 | SPS650 | SPS700 |
|------------------------------------|------|--------|--------|--------|
| $\text{Bi}_2\text{Fe}_4\text{O}_9$ | 100% | 76.3%  | 51.4%  | 5.5%   |
| $\text{Bi}_{25}\text{FeO}_{40}$    | 0%   | 23.7%  | 48.6%  | 94.5%  |

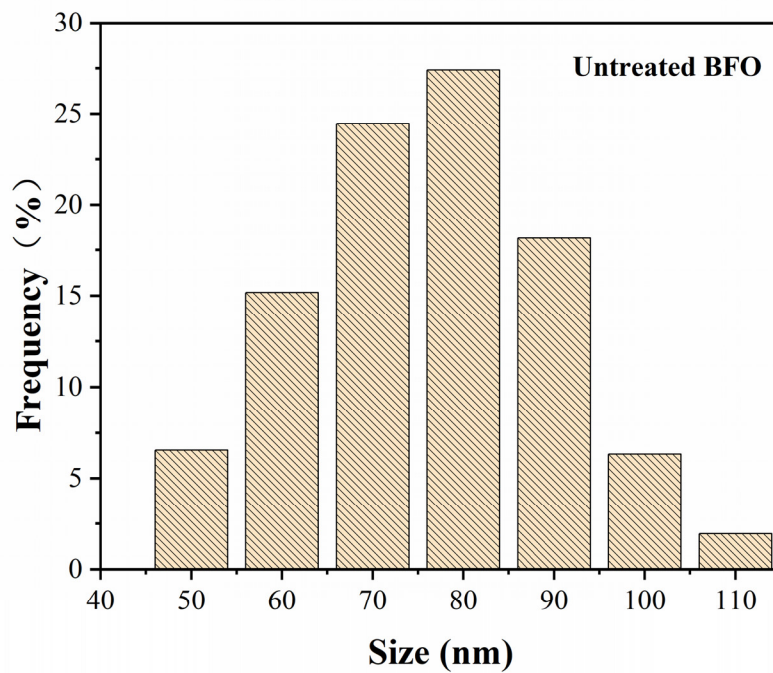

**Figure S2.** Size distribution of untreated BFO.

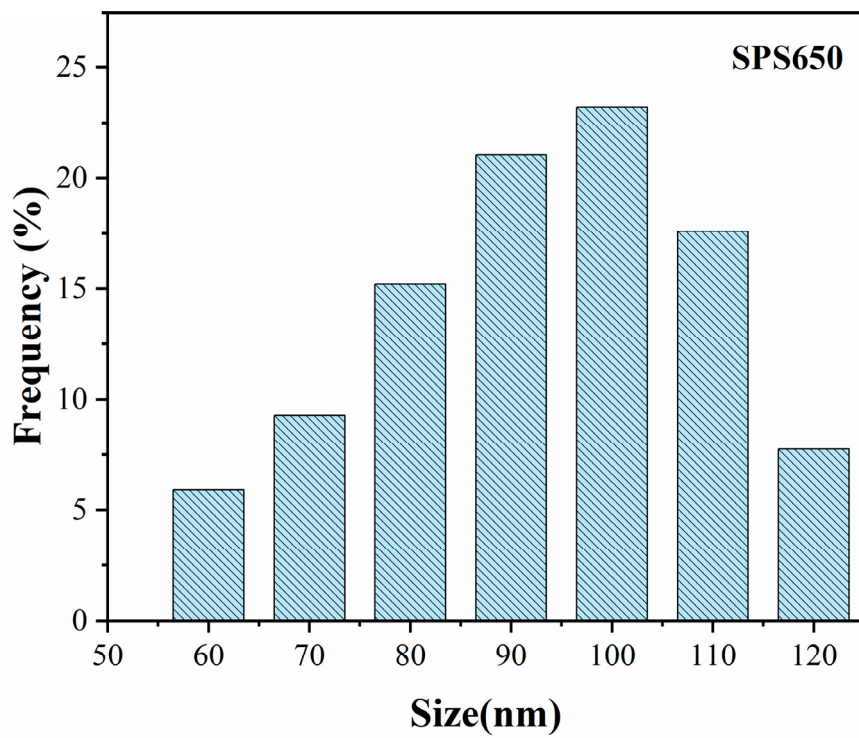

**Figure S3.** Size distribution of SPS650.

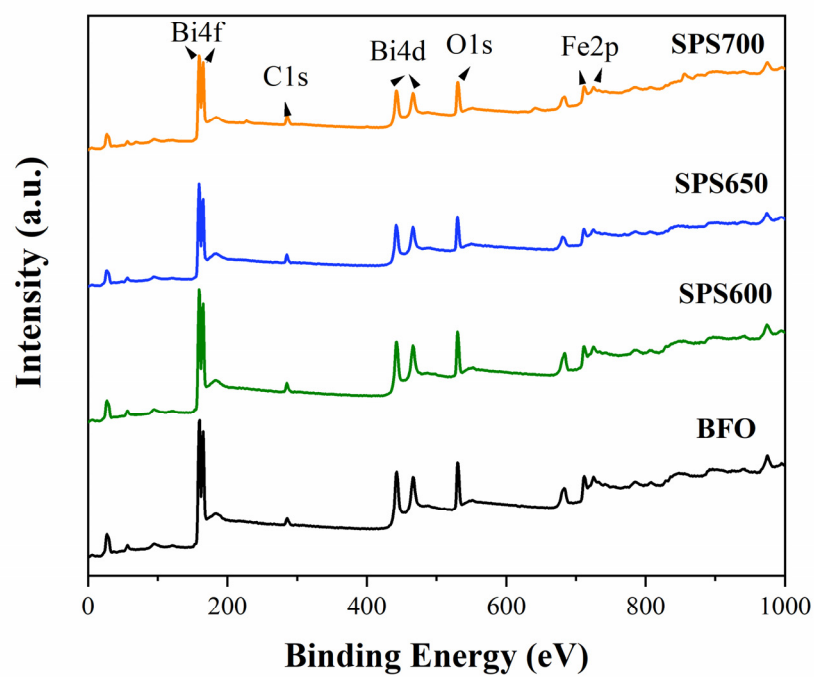

**Figure S4.** survey XPS spectra of different samples.

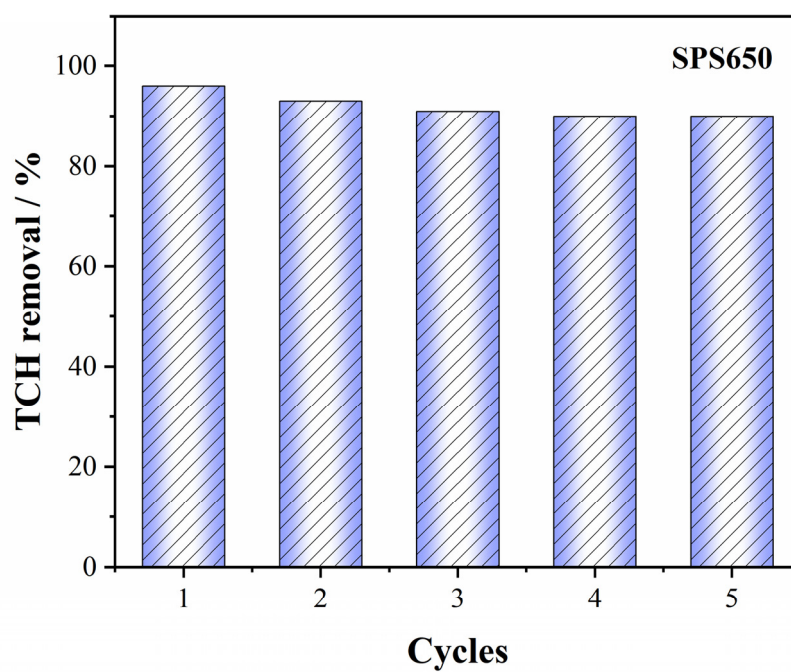

**Figure S5.** Cycling stability of SPS650 for TCH degradation.

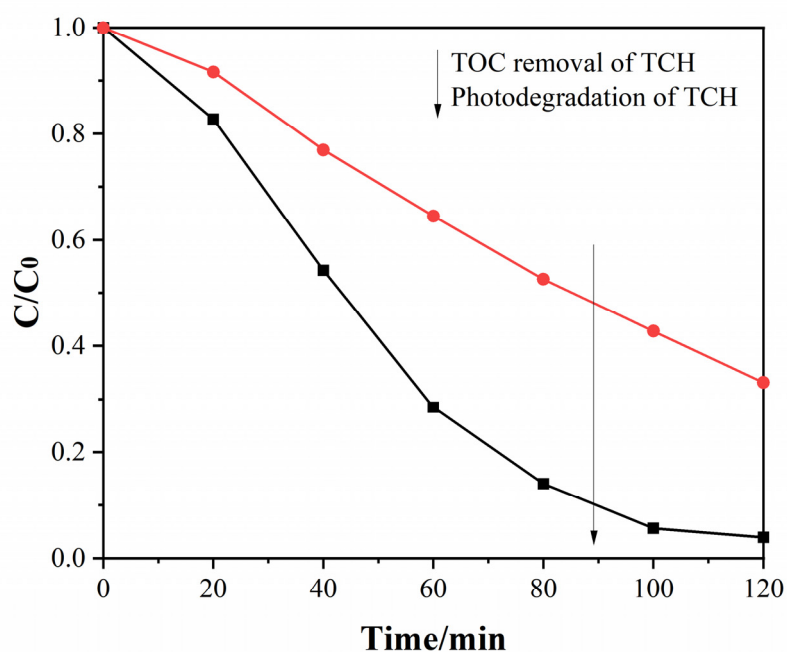

**Figure S6.** The mineralization ability of SPS650 sample for the TCH in terms of TOC removal.

**Table S2. Calculated Apparent Quantum Yield (AQY).**

| Wavelength (nm) | Degraded molecules (μmol) | Light intensity (mW cm <sup>-2</sup> ) | Irradiation area (cm <sup>2</sup> ) | Irradiation time (h) | AQY (%) |
|-----------------|---------------------------|----------------------------------------|-------------------------------------|----------------------|---------|
| 420             | 16.7                      | 7.80                                   | 1.67                                | 2                    | 4.66    |

The number of incident photons:

$$N = \frac{E\lambda}{hc} = \frac{8.5 \times 1.67 \times 10^{-3} \times 2 \times 3600 \times 420 \times 10^{-9}}{6.626 \times 10^{-34} \times 3 \times 10^8} = 2.155 \times 10^{20}$$

$$\begin{aligned}
 AQY\% &= \frac{\text{the number of degraded molecules}}{N} \times 100\% \\
 &= \frac{6.02 \times 10^{23} \times 1.67 \times 10^{-6}}{2.155 \times 10^{20}} \times 100\% \\
 &= 4.66\%
 \end{aligned}$$

**Table S3. Comparison of catalytic activities of different catalysts.**

| Catalyst                                                                           | Reaction conditions                                                                                       | Kinetics                                                                 | References |
|------------------------------------------------------------------------------------|-----------------------------------------------------------------------------------------------------------|--------------------------------------------------------------------------|------------|
| Bi <sub>2</sub> Fe <sub>4</sub> O <sub>9</sub> @Bi <sub>25</sub> FeO <sub>40</sub> | Catalyst = 0.2 g/L,<br>[TC] = 50 mg/L,                                                                    | Pseudo first order kinetic<br>$k = 2.5 \times 10^{-2} \text{ min}^{-1}$  | This work  |
| Schorl                                                                             | Catalyst = 10.0 g/L,<br>[TC] = 100 mg/L,<br>[H <sub>2</sub> O <sub>2</sub> ] = 9.9 mM,<br>pH = 3.0, 40 °C | Pseudo first order kinetic<br>$k = 0.70 \times 10^{-2} \text{ min}^{-1}$ | [1]        |
| Carbon dots/MoO <sub>3</sub> /g-C <sub>3</sub> N <sub>4</sub>                      | Catalyst = 0.6 g/L,<br>[TC] = 20 mg/L,                                                                    | Pseudo first order kinetic<br>$k = 2.31 \times 10^{-2} \text{ min}^{-1}$ | [2]        |
| Ag/Ag <sub>2</sub> CO <sub>3</sub> /BiVO <sub>4</sub>                              | Catalyst = 0.4 g/L,<br>[TC] = 20 mg/L,                                                                    | Pseudo first order kinetic<br>$k = 1.86 \times 10^{-2} \text{ min}^{-1}$ | [3]        |
| Ag/AgIn <sub>5</sub> S <sub>8</sub>                                                | Catalyst = 0.3 g/L,<br>[TC] = 10 mg/L,<br>pH = 4.4                                                        | Pseudo first order kinetic<br>$k = 2.30 \times 10^{-2} \text{ min}^{-1}$ | [4]        |
| Fe <sub>3</sub> O <sub>4</sub> /rGO/TiO <sub>2</sub>                               | Catalyst = none,<br>[TC] = 20 mg/L,<br>[H <sub>2</sub> O <sub>2</sub> ] = 20 mM,<br>pH = 3                | Not mentioned                                                            | [5]        |
| Chalcopyrite                                                                       | Catalyst = 1 g/L,<br>[TC] = 89 mg/L,<br>pH = 5.94                                                         | Pseudo first order kinetic<br>$k = 0.91 \times 10^{-2} \text{ min}^{-1}$ | [6]        |

**Reference**

1. Zhang, Y.; Shi, J.; Xu, Z.; Chen, Y.; Song, D. Degradation of tetracycline in a schorl/H<sub>2</sub>O<sub>2</sub> system: Proposed mechanism and intermediates. *Chemosphere* 2018, 202, 661–668.
2. Xie, Z.; Feng, Y.; Wang, F.; Chen, D.; Zhang, Q.; Zeng, Y.; Lv, W.; Liu, G. Construction of carbon dots modified MoO<sub>3</sub>/g-C<sub>3</sub>N<sub>4</sub> Z-scheme photocatalyst with enhanced visible-light photocatalytic activity for the degradation of tetracycline. *Appl. Catal. B Environ.* 2018, 229, 96–104.
3. Liu, Y.; Kong, J.; Yuan, J.; Zhao, W.; Zhu, X.; Sun, C.; Xie, J. Enhanced photocatalytic activity over flower-like sphere Ag/Ag<sub>2</sub>CO<sub>3</sub>/BiVO<sub>4</sub> plasmonic heterojunction photocatalyst for tetracycline degradation. *Chem. Eng. J.* 2018, 331, 242–254.
4. Deng, F.; Zhao, L.; Luo, X.; Luo, S.; Dionysiou, D. D. Highly efficient visible-light photocatalytic performance of Ag/AgIn<sub>5</sub>S<sub>8</sub> for degradation of tetracycline hydrochloride and treatment of real pharmaceutical industry wastewater. *Chem. Eng. J.* 2018, 333, 423–433.
5. Wang, W.; Xiao, K.; Zhu, L.; Yin, Y.; Wang, Z. Graphene oxide supported titanium dioxide & ferroferric oxide hybrid, a magnetically separable photocatalyst with enhanced photocatalytic activity for tetracycline hydrochloride degradation. *RSC Adv.* 2017, 7, 21287–21297.
6. Barhoumi, H.; Olvera-Vargas, N.; Oturan, D.; Huguenot, A.; Gadri, S.; Ammar, E.; Brillas, M.A. Kinetics of oxidative degradation/mineralization pathways of the antibiotic tetracycline by the novel heterogeneous electro-Fenton process with solid catalyst chalcopyrite. *Appl. Catal. B Environ.* 2017, 209, 637–647.
